# Supplementary material for: Substrates of the ASB2α E3 ubiquitin ligase in dendritic cells
Source: PubMed Central journal article supplement (PMC4633680; doi:10.1038/srep16269), 2015-11-05
Supplement: srep16269-s1.pdf [file srep16269-s1.pdf]

## Substrates of the ASB2 $\alpha$ E3 ubiquitin ligase in dendritic cells

Camille A. Spinner, Sandrine Uttenweiler-Joseph, Arnaud Metais, Alexandre Stella, Odile Burlet-Schiltz, Christel Moog-Lutz, Isabelle Lamsoul & Pierre G. Lutz

### Legend to supplemental figure 1

**Figure S1:** Reproducibility of individual measurements amongst biological replicates of ASB2 $\alpha^{+/+}$  or ASB2 $\alpha^{-/-}$  BMDCs. Protein intensities of all ASB2 $\alpha^{+/+}$  (A and C) or ASB2 $\alpha^{-/-}$  (B and D) BMDCs measured using MaxQuant (A and B) or MFPaQ (C and D) label-free quantitation algorithms are plotted against each other. Correlation between measurements is determined by Pearson coefficient (R).

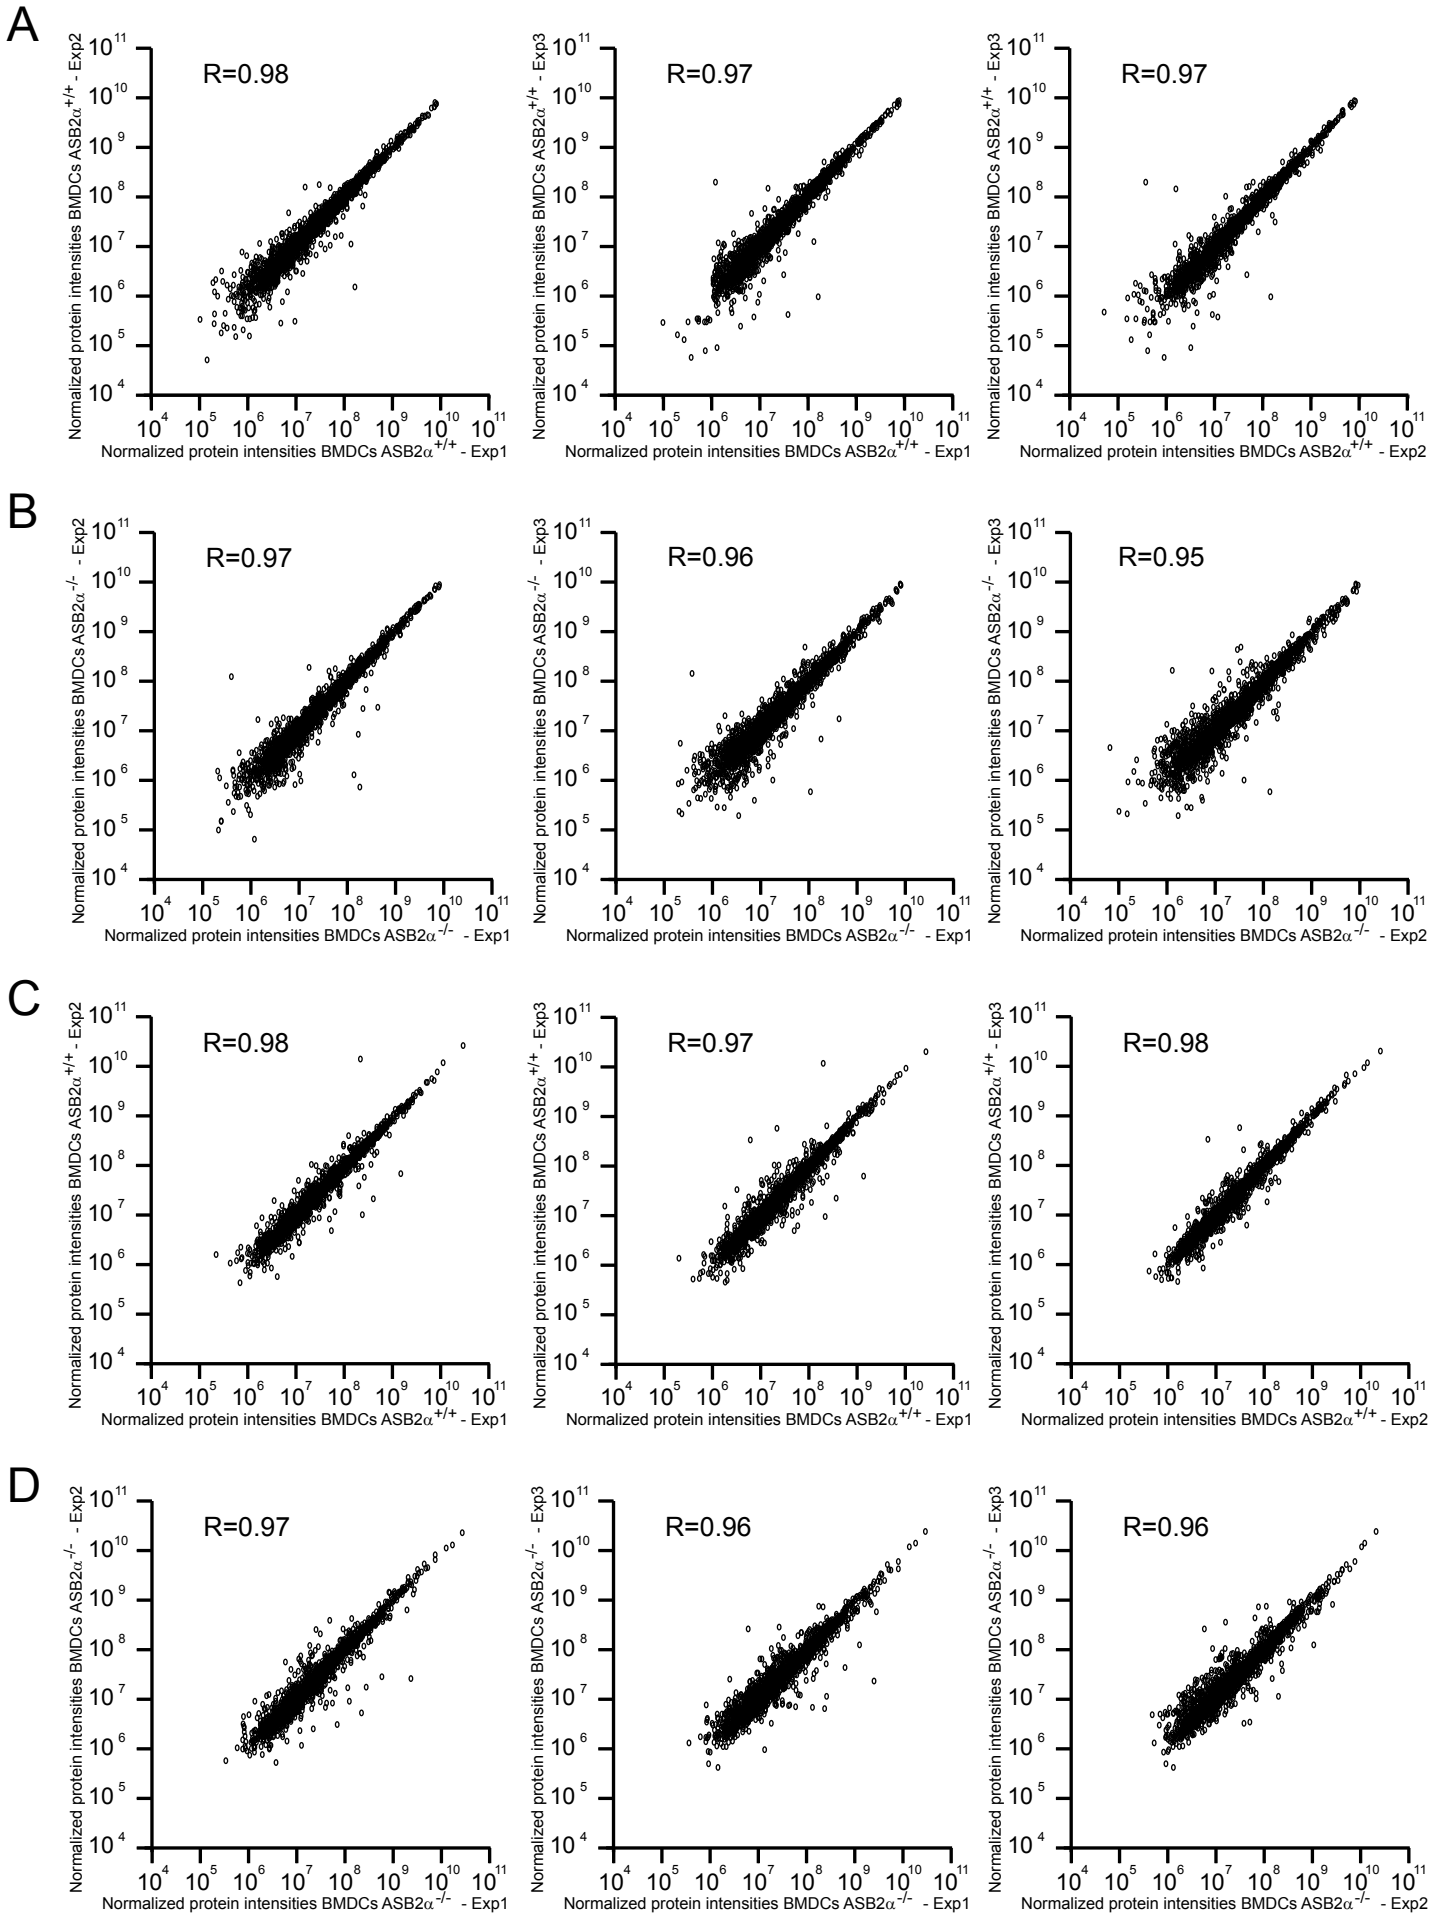

Figure S1
